# Supplementary material
Source: PubMed Central journal article supplement (PMC10967367)
Supplement: ehp12548.smcontents.508.pdf [file ehp12548.smcontents.508.pdf]

**Note to readers with disabilities:** *EHP* strives to ensure that all journal content is accessible to all readers. However, some figures and Supplemental Material published in *EHP* articles may not conform to [508 standards](#) due to the complexity of the information being presented. If you need assistance accessing journal content, please contact [ehp508@niehs.nih.gov](mailto:ehp508@niehs.nih.gov). Our staff will work with you to assess and meet your accessibility needs within 3 working days.

### **Supplemental Material**

#### **Effect of an Arsenic Mitigation Program on Arsenic Exposure in American Indian Communities: A Cluster Randomized Controlled Trial of the Community-Led Strong Heart Water Study Program**

Christine Marie George, Tracy Zacher, Kelly Endres, Francine Richards, Lisa Bear Robe, David Harvey, Lyle G. Best, Reno Red Cloud, Annabelle Black Bear, Leslie Skinner, Christa Cuny, Ana Rule, Kellogg J. Schwab, Joel Gittelsohn, Ronald Alexander Glabonjat, Kathrin Schilling, Marcia O’Leary, Elizabeth D. Thomas, Jason Umans, Jianhui Zhu, Lawrence H. Moulton, and Ana Navas-Acien

#### **Table of Contents**

##### **Urinary Arsenic Analysis Standard Operating Procedure**

**Table S1.** Baseline participant characteristics overall and by household water arsenic ( $\mu\text{g/L}$ ) quartile for the Strong Heart Water Study randomized controlled trial.

**Table S2.** Baseline participant characteristics overall and by urinary arsenic ( $\mu\text{g/g}$  creatinine) quartile in the Strong Heart Water Study randomized controlled trial.

**Table S3.** Regression of urinary total arsenic ( $\mu\text{g/g}$  creatinine) at final follow-up visit comparing participants reporting exclusive arsenic-safe water use to participants reporting non-exclusive arsenic-safe water use (N=71) in the Strong Heart Water Study randomized controlled trial.

**Table S4.** Water source used to prepare drink and food items for participants in the Strong Heart Water Study randomized controlled trial.

**Table S5.** Water source used to prepare drink and food items by study arm (N=75) for participants in the Strong Heart Water Study randomized controlled trial.

**Additional File-** Excel Document
